# Supplementary material for: OGEE v3: Online GEne Essentiality database with increased coverage of organisms and human cell lines
Source: PubMed Central journal article supplement — Nucleic Acids Res. 2020 Oct 21;49(D1):D998–D1003. doi: 10.1093/nar/gkaa884 (PMC7779042; doi:10.1093/nar/gkaa884), 2020-10-21
Supplement: gkaa884_supplemental_file.pdf [file gkaa884_supplemental_file.pdf]

| Species                                                     | Definition of essentiality                                                                | Reference database or pmid |
|-------------------------------------------------------------|-------------------------------------------------------------------------------------------|----------------------------|
| <b>Lists of species with reference databases</b>            |                                                                                           |                            |
| <i>Arabidopsis thaliana</i>                                 | Embryo defective vs confirmed                                                             | Seed Genes & TAIR          |
| <i>Aspergillus</i> spp.                                     | Viable vs Inviable                                                                        | AspGD                      |
| <i>Caenorhabditis elegans</i>                               | Lethal vs NOT phenotypes                                                                  | WormBase                   |
| <i>Danio rerio</i>                                          | Lethal Genes                                                                              | ZFIN                       |
| <i>Drosophila melanogaster</i>                              | Lethal vs Viable Phenotypes                                                               | FlyBase                    |
| <i>Mus musculus</i>                                         | Lethal vs Viable Phenotypes                                                               | IMPC and MGD               |
| <i>Saccharomyces cerevisiae</i>                             | Viable vs Inviable                                                                        | SGD                        |
| <i>Schizosaccharomyces pombe</i>                            | Viable vs Inviable                                                                        | PomBase                    |
| <i>Plasmodium</i> spp.                                      | Essential vs dispensable genes                                                            | PlasmoDB                   |
| <i>Toxoplasma gondii</i>                                    | Essential vs dispensable genes                                                            | ToxoDB                     |
| <i>Trypanosoma brucei</i>                                   | Lethal vs Normal growth                                                                   | TritypDB                   |
| <i>Escherichia coli</i> k12                                 | Genes whose mutants cannot be obtained from the mutagenesis library are essential         | PEC                        |
| <b>Lists of species collected from PubMed</b>               |                                                                                           |                            |
| <i>Bacteroides fragilis</i> 638R                            | Genes Required by <i>B. fragilis</i> for Survival in BHI medium (growth)                  | 24899126                   |
| <i>Bacteroides thetaiotaomicron</i> VPI-5482                | Genes required for maximal exponential growth in rich medium (TYG medium) <i>in vitro</i> | 19748469                   |
| <i>Burkholderia pseudomallei</i> K96243                     | Genes required for bacterial growth                                                       | 24520057                   |
| <i>Burkholderia thailandensis</i> E264                      | Genes received fewer than three insertions per kB in the 5–90% region in mutant pools.    | 23382856                   |
| <i>Campylobacter jejuni</i> subsp. 81-176                   | Genes required for optimal growth on MH agar plates under microaerophilic conditions      | 28806924                   |
| <i>Campylobacter jejuni</i> subsp. <i>jejuni</i> NCTC 11168 | Genes required for optimal growth on MH agar plates under microaerophilic conditions      | 28806924, 22044676         |
| <i>Methanococcus maripaludis</i> S2                         | Genes essential for growth with fewer insertions                                          | 23487778                   |
| <i>Rhodopseudomonas palustris</i> CGA009                    | Genes required for viability under specialized growth conditions                          | 26712940                   |
| <i>Streptococcus agalactiae</i> A909                        | Gene fitness assignments                                                                  | 27229469                   |
| <i>Streptococcus pyogenes</i> M1T1 5448                     | Tn-seq analyses of GAS fitness and <i>in vitro</i> growth condition                       | 25996237                   |
| <i>Streptococcus pyogenes</i> NZ131                         | Tn-seq analyses of GAS fitness and <i>in vitro</i> growth condition                       | 25996237                   |
| <i>Streptococcus sanguinis</i>                              | Genes not mutagenized after five independent attempts                                     | 22355642                   |

Supplementary Table 1: List of databases or sources of datasets collected for OGEE v3.

| Cell lines | RNAi            |                     |                    | CRISPR-Cas9     |                     |                    | Common genes |
|------------|-----------------|---------------------|--------------------|-----------------|---------------------|--------------------|--------------|
|            | Essential genes | Non-essential genes | Total tested genes | Essential genes | Non-essential genes | Total tested genes |              |
| 22RV1      | 266             | 11144               | 11410              | 312             | 17683               | 17995              | 20           |
| 2313287    | 660             | 16420               | 17080              | 885             | 17110               | 17995              | 307          |
| 769P       | 245             | 16835               | 17080              | 1067            | 16928               | 17995              | 105          |
| A172       | 334             | 11076               | 11410              | 777             | 17218               | 17995              | 33           |
| A2058      | 512             | 10898               | 11410              | 906             | 17089               | 17995              | 218          |
| A375       | 490             | 16590               | 17080              | 1508            | 16487               | 17995              | 188          |
| A549       | 297             | 11113               | 11410              | 1038            | 16957               | 17995              | 72           |
| AGS        | 684             | 10726               | 11410              | 1314            | 16681               | 17995              | 317          |
| AM38       | 203             | 11207               | 11410              | 581             | 17414               | 17995              | 23           |
| ASPC1      | 410             | 11000               | 11410              | 399             | 17596               | 17995              | 64           |
| AU565      | 361             | 16719               | 17080              | 841             | 17154               | 17995              | 54           |
| BHY        | 407             | 16673               | 17080              | 889             | 17106               | 17995              | 152          |
| BICR22     | 510             | 16570               | 17080              | 1199            | 16796               | 17995              | 178          |
| BXPC3      | 290             | 11120               | 11410              | 592             | 17403               | 17995              | 71           |
| C2BBE1     | 267             | 11102               | 11369              | 1051            | 16944               | 17995              | 63           |
| CAL27      | 312             | 16768               | 17080              | 1283            | 16712               | 17995              | 66           |
| CAL33      | 482             | 16598               | 17080              | 1260            | 16735               | 17995              | 187          |
| CAL51      | 441             | 10969               | 11410              | 480             | 17515               | 17995              | 45           |
| CAOV4      | 244             | 11166               | 11410              | 632             | 17363               | 17995              | 25           |
| CAS1       | 319             | 11091               | 11410              | 492             | 17503               | 17995              | 7            |
| COLO205    | 347             | 11063               | 11410              | 1185            | 16810               | 17995              | 99           |
| COLO680N   | 644             | 16436               | 17080              | 935             | 17060               | 17995              | 338          |
| COLO684    | 496             | 16584               | 17080              | 486             | 17509               | 17995              | 157          |
| CORL23     | 427             | 10983               | 11410              | 1251            | 16744               | 17995              | 118          |
| DBTRG05MG  | 187             | 11223               | 11410              | 1018            | 16977               | 17995              | 24           |
| DKMG       | 214             | 11196               | 11410              | 687             | 17308               | 17995              | 31           |
| DU145      | 227             | 16853               | 17080              | 638             | 17357               | 17995              | 87           |
| EBC1       | 401             | 16679               | 17080              | 513             | 17482               | 17995              | 77           |
| ECGI10     | 352             | 16728               | 17080              | 648             | 17347               | 17995              | 34           |
| EFO21      | 437             | 10932               | 11369              | 111             | 17884               | 17995              | 44           |
| EFO27      | 213             | 11197               | 11410              | 540             | 17455               | 17995              | 27           |
| EPLC272H   | 206             | 16874               | 17080              | 585             | 17410               | 17995              | 26           |
| ES2        | 223             | 16857               | 17080              | 1018            | 16977               | 17995              | 79           |
| ESS1       | 252             | 16828               | 17080              | 1279            | 16716               | 17995              | 117          |
| FADU       | 448             | 16632               | 17080              | 1386            | 16609               | 17995              | 144          |
| GB1        | 254             | 11156               | 11410              | 859             | 17136               | 17995              | 34           |
| HCC1143    | 251             | 16829               | 17080              | 872             | 17123               | 17995              | 43           |
| HCC1187    | 419             | 10991               | 11410              | 849             | 17146               | 17995              | 102          |
| HCC1395    | 188             | 11222               | 11410              | 453             | 17542               | 17995              | 42           |

|               |     |       |       |      |       |       |     |
|---------------|-----|-------|-------|------|-------|-------|-----|
| HCC15         | 274 | 16806 | 17080 | 622  | 17373 | 17995 | 56  |
| HCC1806       | 706 | 16374 | 17080 | 906  | 17089 | 17995 | 363 |
| HCC1937       | 561 | 16519 | 17080 | 539  | 17456 | 17995 | 161 |
| HCC1954       | 498 | 10912 | 11410 | 350  | 17645 | 17995 | 87  |
| HCC38         | 173 | 16907 | 17080 | 879  | 17116 | 17995 | 32  |
| HCC70         | 534 | 10876 | 11410 | 857  | 17138 | 17995 | 226 |
| HCT116        | 556 | 10854 | 11410 | 996  | 16999 | 17995 | 172 |
| HGC27         | 299 | 16781 | 17080 | 964  | 17031 | 17995 | 24  |
| HOP62         | 265 | 16815 | 17080 | 1035 | 16960 | 17995 | 97  |
| HPAFII        | 394 | 11016 | 11410 | 536  | 17459 | 17995 | 88  |
| HS578T        | 205 | 16875 | 17080 | 653  | 17342 | 17995 | 29  |
| HS683         | 205 | 11205 | 11410 | 746  | 17249 | 17995 | 16  |
| HSC3          | 403 | 16677 | 17080 | 1211 | 16784 | 17995 | 193 |
| HT55          | 749 | 10661 | 11410 | 1008 | 16987 | 17995 | 212 |
| HUPT3         | 817 | 16263 | 17080 | 708  | 17287 | 17995 | 324 |
| IGROV1        | 231 | 11138 | 11369 | 518  | 17477 | 17995 | 46  |
| IM95          | 389 | 16691 | 17080 | 619  | 17376 | 17995 | 77  |
| JHOS2         | 400 | 16680 | 17080 | 976  | 17019 | 17995 | 141 |
| KATOIII       | 602 | 16478 | 17080 | 388  | 17607 | 17995 | 103 |
| KM12          | 363 | 11006 | 11369 | 732  | 17263 | 17995 | 71  |
| KNS62         | 437 | 16643 | 17080 | 784  | 17211 | 17995 | 148 |
| KP4           | 226 | 11184 | 11410 | 1114 | 16881 | 17995 | 35  |
| KURAMOCHI     | 478 | 10932 | 11410 | 425  | 17570 | 17995 | 140 |
| KYSE140       | 408 | 16672 | 17080 | 857  | 17138 | 17995 | 205 |
| KYSE150       | 239 | 11171 | 11410 | 952  | 17043 | 17995 | 29  |
| KYSE450       | 383 | 11027 | 11410 | 1179 | 16816 | 17995 | 103 |
| KYSE510       | 284 | 11126 | 11410 | 1008 | 16987 | 17995 | 62  |
| KYSE520       | 399 | 16681 | 17080 | 981  | 17014 | 17995 | 131 |
| KYSE70        | 366 | 16714 | 17080 | 916  | 17079 | 17995 | 173 |
| L363          | 334 | 11076 | 11410 | 1760 | 16235 | 17995 | 63  |
| LCLC97TM1     | 303 | 16777 | 17080 | 827  | 17168 | 17995 | 81  |
| LK2           | 425 | 10985 | 11410 | 876  | 17119 | 17995 | 149 |
| LN229         | 241 | 11169 | 11410 | 755  | 17240 | 17995 | 34  |
| LNCAPCLONEFGC | 413 | 16667 | 17080 | 1005 | 16990 | 17995 | 108 |
| LOUNH91       | 327 | 16753 | 17080 | 555  | 17440 | 17995 | 14  |
| LOVO          | 310 | 11100 | 11410 | 1067 | 16928 | 17995 | 88  |
| LS180         | 294 | 16786 | 17080 | 1349 | 16646 | 17995 | 78  |
| LS411N        | 292 | 11118 | 11410 | 1069 | 16926 | 17995 | 54  |
| LS513         | 338 | 11072 | 11410 | 1186 | 16809 | 17995 | 114 |
| LU65          | 373 | 16707 | 17080 | 793  | 17202 | 17995 | 164 |
| LXF289        | 229 | 16851 | 17080 | 1146 | 16849 | 17995 | 126 |
| MCF7          | 569 | 10841 | 11410 | 738  | 17257 | 17995 | 126 |

|          |      |       |       |      |       |       |     |
|----------|------|-------|-------|------|-------|-------|-----|
| MDAMB231 | 572  | 16508 | 17080 | 871  | 17124 | 17995 | 209 |
| MDAMB361 | 308  | 16772 | 17080 | 355  | 17640 | 17995 | 81  |
| MDAMB415 | 172  | 16908 | 17080 | 411  | 17584 | 17995 | 23  |
| MDAMB436 | 421  | 16659 | 17080 | 822  | 17173 | 17995 | 175 |
| MDAMB453 | 767  | 10643 | 11410 | 434  | 17561 | 17995 | 138 |
| MDAMB468 | 476  | 16604 | 17080 | 1141 | 16854 | 17995 | 216 |
| MFE280   | 414  | 16666 | 17080 | 255  | 17740 | 17995 | 30  |
| MHHES1   | 182  | 16898 | 17080 | 1021 | 16974 | 17995 | 26  |
| MIAPACA2 | 373  | 11037 | 11410 | 677  | 17318 | 17995 | 125 |
| NCIH1155 | 309  | 16771 | 17080 | 932  | 17063 | 17995 | 54  |
| NCIH1299 | 546  | 10864 | 11410 | 924  | 17071 | 17995 | 194 |
| NCIH1355 | 499  | 16581 | 17080 | 662  | 17333 | 17995 | 181 |
| NCIH1568 | 1176 | 15904 | 17080 | 387  | 17608 | 17995 | 251 |
| NCIH1650 | 524  | 10886 | 11410 | 687  | 17308 | 17995 | 102 |
| NCIH1915 | 188  | 16892 | 17080 | 568  | 17427 | 17995 | 15  |
| NCIH1944 | 704  | 16376 | 17080 | 666  | 17329 | 17995 | 270 |
| NCIH1975 | 162  | 11248 | 11410 | 776  | 17219 | 17995 | 15  |
| NCIH2023 | 236  | 16844 | 17080 | 1049 | 16946 | 17995 | 90  |
| NCIH2087 | 470  | 16610 | 17080 | 654  | 17341 | 17995 | 144 |
| NCIH2170 | 217  | 16863 | 17080 | 791  | 17204 | 17995 | 58  |
| NCIH23   | 445  | 10965 | 11410 | 1110 | 16885 | 17995 | 205 |
| NCIH358  | 563  | 16517 | 17080 | 596  | 17399 | 17995 | 208 |
| NCIH520  | 355  | 16725 | 17080 | 733  | 17262 | 17995 | 26  |
| NCIH650  | 265  | 16815 | 17080 | 288  | 17707 | 17995 | 35  |
| NCIN87   | 352  | 11058 | 11410 | 948  | 17047 | 17995 | 121 |
| NUGC3    | 365  | 16715 | 17080 | 970  | 17025 | 17995 | 151 |
| OAW42    | 349  | 11020 | 11369 | 0    | 17995 | 17995 | 0   |
| OC314    | 312  | 16768 | 17080 | 1366 | 16629 | 17995 | 97  |
| OCIAML2  | 429  | 10981 | 11410 | 1161 | 16834 | 17995 | 91  |
| OCIAML3  | 348  | 11062 | 11410 | 585  | 17410 | 17995 | 27  |
| OE33     | 349  | 11061 | 11410 | 978  | 17017 | 17995 | 88  |
| OPM2     | 344  | 11066 | 11410 | 874  | 17121 | 17995 | 28  |
| OV90     | 210  | 11200 | 11410 | 781  | 17214 | 17995 | 26  |
| OVCAR8   | 527  | 10883 | 11410 | 980  | 17015 | 17995 | 164 |
| OVISE    | 508  | 10902 | 11410 | 895  | 17100 | 17995 | 233 |
| PANC0327 | 422  | 10988 | 11410 | 855  | 17140 | 17995 | 145 |
| PANC0813 | 701  | 10709 | 11410 | 601  | 17394 | 17995 | 232 |
| PANC1005 | 390  | 11020 | 11410 | 295  | 17700 | 17995 | 23  |
| PC14     | 233  | 16847 | 17080 | 899  | 17096 | 17995 | 72  |
| PSN1     | 337  | 11073 | 11410 | 1157 | 16838 | 17995 | 125 |
| RKN      | 316  | 11094 | 11410 | 318  | 17677 | 17995 | 42  |
| RKO      | 672  | 10738 | 11410 | 1251 | 16744 | 17995 | 365 |

|         |     |       |       |      |       |       |     |
|---------|-----|-------|-------|------|-------|-------|-----|
| RL952   | 245 | 16835 | 17080 | 1022 | 16973 | 17995 | 32  |
| RMGI    | 260 | 11109 | 11369 | 416  | 17579 | 17995 | 39  |
| SCC4    | 414 | 16666 | 17080 | 910  | 17085 | 17995 | 81  |
| SF126   | 169 | 11241 | 11410 | 870  | 17125 | 17995 | 18  |
| SF295   | 195 | 11215 | 11410 | 1089 | 16906 | 17995 | 9   |
| SJSA1   | 280 | 11130 | 11410 | 1074 | 16921 | 17995 | 44  |
| SKMEL2  | 421 | 16659 | 17080 | 1251 | 16744 | 17995 | 156 |
| SKMES1  | 335 | 16745 | 17080 | 532  | 17463 | 17995 | 94  |
| SNUC1   | 504 | 10906 | 11410 | 859  | 17136 | 17995 | 138 |
| SU8686  | 518 | 10892 | 11410 | 693  | 17302 | 17995 | 187 |
| SUDHL10 | 396 | 16684 | 17080 | 1050 | 16945 | 17995 | 21  |
| SW1573  | 463 | 16617 | 17080 | 923  | 17072 | 17995 | 112 |
| SW48    | 167 | 11243 | 11410 | 1112 | 16883 | 17995 | 39  |
| SW620   | 374 | 16706 | 17080 | 1030 | 16965 | 17995 | 41  |
| SW837   | 364 | 16716 | 17080 | 769  | 17226 | 17995 | 103 |
| T47D    | 257 | 16823 | 17080 | 755  | 17240 | 17995 | 49  |
| T98G    | 350 | 11060 | 11410 | 823  | 17172 | 17995 | 18  |
| TC71    | 262 | 11148 | 11410 | 1127 | 16868 | 17995 | 29  |
| TE10    | 469 | 10941 | 11410 | 1293 | 16702 | 17995 | 237 |
| TE4     | 597 | 16483 | 17080 | 1006 | 16989 | 17995 | 288 |
| TE8     | 286 | 16794 | 17080 | 942  | 17053 | 17995 | 96  |
| TE9     | 402 | 11008 | 11410 | 718  | 17277 | 17995 | 52  |
| TOV112D | 268 | 11142 | 11410 | 840  | 17155 | 17995 | 48  |
| TOV21G  | 440 | 10929 | 11369 | 1152 | 16843 | 17995 | 181 |
| TT      | 253 | 11116 | 11369 | 1344 | 16651 | 17995 | 23  |
| TYKNU   | 335 | 11075 | 11410 | 1016 | 16979 | 17995 | 50  |
| U87MG   | 312 | 11098 | 11410 | 668  | 17327 | 17995 | 31  |

Supplementary Table 2: List of 150 cell lines tested by both CRISPR-Cas9 and RNAi screening. Common genes (8<sup>th</sup> column) denotes the numbers of overlapping essential genes between CRISPR-Cas9 and RNAi datasets.
